# Supplementary material
Source: PubMed Central journal article supplement (PMC4067966)
Supplement: NIHMS569471-supplement-01.pdf [file NIHMS569471-supplement-01.pdf]

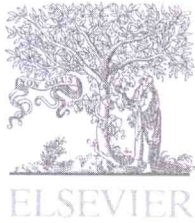

**Toxicology**  
**Conflict of Interest Policy**

Manuscript number (if applicable):  
Article Title: DEVELOPMENTAL CIGARETTE SMOKE  
EXPOSURE: HIPPOCAMPUS PROTEOME AND  
METABOLOME PROFILES IN LOW BIRTH WEIGHT  
PIIDS

Author name: Rachel E. Neal, Jing Chen, Rekha  
Jagadapillai, HyeJeong Jang, Guy Brock, Bassam  
Abomoelak, Robert M. Greene, M. Michele Pisano

**Declarations**

*Toxicology* requires that all authors sign a declaration of conflicting interests. If you have nothing to declare in any of these categories then this should be stated.

**Conflict of Interest**

Please declare any financial or personal interests that might be potentially viewed to influence the work presented. Interests could include consultancies, honoraria, patent ownership or other. If there are none state 'there are none'.

**Please state any competing interests**

None

**Funding Source**

All sources of funding should be acknowledged and you should declare any extra funding you have received for academic research of this work. If there are none state 'there are none'.

**Please state any sources of funding for your research**

Research in the present study was supported in part by a COBRE grant (P20 GM103453-10) from the National Institute of General Medical Sciences at the National Institutes of Health, by PHS grant NIH R21DA027466, and by the University of Louisville CREAM Center from NSF EPSCoR grant EPS-0447479.

**Signature** (a scanned signature is acceptable, but each author must sign)

**Print name**

Rachel Neal

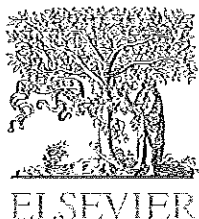

**Toxicology**  
**Conflict of Interest Policy**

Manuscript number (if applicable):  
Article Title: DEVELOPMENTAL CIGARETTE SMOKE  
EXPOSURE: HIPPOCAMPUS PROTEOME AND  
METABOLOME PROFILES IN LOW BIRTH WEIGHT  
PIPS

Author name: Rachel E. Neal, Jing Chen, Rekha  
Jagadapillai, HyeJeong Jang, Guy Brock, Bassam  
Abomoelak, Robert M. Greene, M. Michele Pisano

**Declarations**

*Toxicology* requires that all authors sign a declaration of conflicting interests. If you have nothing to declare in any of these categories then this should be stated.

**Conflict of Interest**

Please declare any financial or personal interests that might be potentially viewed to influence the work presented. Interests could include consultancies, honoraria, patent ownership or other. If there are none state 'there are none'.

**Please state any competing interests**

None

**Funding Source**

All sources of funding should be acknowledged and you should declare any extra funding you have received for academic research of this work. If there are none state 'there are none'.

**Please state any sources of funding for your research**

Research in the present study was supported in part by a COBRE grant (P20 GM103453-10) from the National Institute of General Medical Sciences at the National Institutes of Health, by PHS grant NIH R21DA027466, and by the University of Louisville CREAM Center from NSF EPSCoR grant EPS-0447479.

**Signature** (a scanned signature is acceptable,  
but each author must sign)

**Print name**

Jing Chen

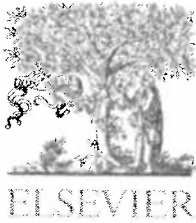

**Toxicology**  
**Conflict of Interest Policy**

Manuscript number (if applicable):  
Article Title: DEVELOPMENTAL CIGARETTE SMOKE  
EXPOSURE: HIPPOCAMPUS PROTEOME AND  
METABOLOME PROFILES IN LOW BIRTH WEIGHT  
PIIPS

Author name: Rachel E. Neal, Jing Chen, Rekha  
Jagadapillai, HyeJeong Jang, Guy Brock, Bassam  
Abomoelak, Robert M. Greene, M. Michele Pisano

**Declarations**

*Toxicology* requires that all authors sign a declaration of conflicting interests. If you have nothing to declare in any of these categories then this should be stated.

**Conflict of Interest**

Please declare any financial or personal interests that might be potentially viewed to influence the work presented. Interests could include consultancies, honoraria, patent ownership or other. If there are none state 'there are none'.

**Please state any competing interests**

None

**Funding Source**

All sources of funding should be acknowledged and you should declare any extra funding you have received for academic research of this work. If there are none state 'there are none'.

**Please state any sources of funding for your research**

Research in the present study was supported in part by a COBRE grant (P20 GM103453-10) from the National Institute of General Medical Sciences at the National Institutes of Health, by PHS grant NIH R21DA027466, and by the University of Louisville CREAM Center from NSF EPSCoR grant EPS-0447479.

**Signature** (a scanned signature is acceptable,  
but each author must sign)

**Print name**

REKHA JAGADAPILLA

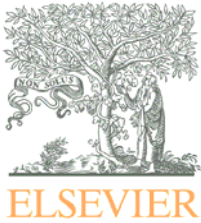

**Toxicology**  
**Conflict of Interest Policy**

Manuscript number (if applicable):  
Article Title: DEVELOPMENTAL CIGARETTE SMOKE  
EXPOSURE: HIPPOCAMPUS PROTEOME AND  
METABOLOME PROFILES IN LOW BIRTH WEIGHT  
PIIPS

Author name: Rachel E. Neal, Jing Chen, Rekha  
Jagadapillai, HyeJeong Jang, Guy Brock, Bassam  
Abomoelak, Robert M. Greene, M. Michele Pisano

**Declarations**

**Toxicology** requires that all authors sign a declaration of conflicting interests. If you have nothing to declare in any of these categories then this should be stated.

**Conflict of Interest**

Please declare any financial or personal interests that might be potentially viewed to influence the work presented. Interests could include consultancies, honoraria, patent ownership or other. If there are none state 'there are none'.

**Please state any competing interests**

None

**Funding Source**

All sources of funding should be acknowledged and you should declare any extra funding you have received for academic research of this work. If there are none state 'there are none'.

**Please state any sources of funding for your research**

Research in the present study was supported in part by a COBRE grant (P20 GM103453-10) from the National Institute of General Medical Sciences at the National Institutes of Health, by PHS grant NIH R21DA027466, and by the University of Louisville CREAM Center from NSF EPSCoR grant EPS-0447479.

**Signature** (a scanned signature is acceptable, but each author must sign)

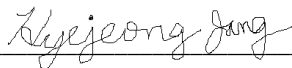

**Print name**

HyeJeong Jang

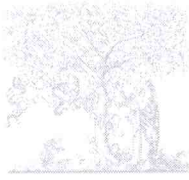

**Toxicology**  
**Conflict of Interest Policy**

Manuscript number (if applicable):  
Article Title: DEVELOPMENTAL CIGARETTE SMOKE  
EXPOSURE: HIPPOCAMPUS PROTEOME AND  
METABOLOME PROFILES IN LOW BIRTH WEIGHT  
PIIPS

Author name: Rachel E. Neal, Jing Chen, Rekha  
Jagadapillai, HyeJeong Jang, Guy Brock, Bassam  
Abomoelak, Robert M. Greene, M. Michele Pisano

**Declarations**

*Toxicology* requires that all authors sign a declaration of conflicting interests. If you have nothing to declare in any of these categories then this should be stated.

**Conflict of Interest**

Please declare any financial or personal interests that might be potentially viewed to influence the work presented. Interests could include consultancies, honoraria, patent ownership or other. If there are none state 'there are none'.

**Please state any competing interests**

None

**Funding Source**

All sources of funding should be acknowledged and you should declare any extra funding you have received for academic research of this work. If there are none state 'there are none'.

**Please state any sources of funding for your research**

Research in the present study was supported in part by a COBRE grant (P20 GM103453-10) from the National Institute of General Medical Sciences at the National Institutes of Health, by PHS grant NIH R21DA027466, and by the University of Louisville CREAM Center from NSF EPSCoR grant EPS-0447479.

**Signature** (a scanned signature is acceptable, but each author must sign)

*ABOMOELAK Bassam*

**Print name**

Bassam ABOMOELAK

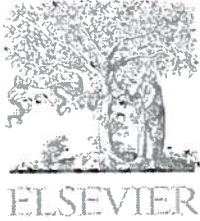

**Toxicology**  
**Conflict of Interest Policy**

Manuscript number (if applicable):  
Article Title: DEVELOPMENTAL CIGARETTE SMOKE  
EXPOSURE: HIPPOCAMPUS PROTEOME AND  
METABOLOME PROFILES IN LOW BIRTH WEIGHT  
PIPS

Author name: Rachel E. Neal, Jing Chen, Rekha  
Jagadapillai, HyeJeong Jang, Guy Brock, Bassam  
Abomoelak, Robert M. Greene, M. Michele Pisano

**Declarations**

**Toxicology** requires that all authors sign a declaration of conflicting interests. If you have nothing to declare in any of these categories then this should be stated.

**Conflict of Interest**

Please declare any financial or personal interests that might be potentially viewed to influence the work presented. Interests could include consultancies, honoraria, patent ownership or other. If there are none state 'there are none'.

**Please state any competing interests**

None

**Funding Source**

All sources of funding should be acknowledged and you should declare any extra funding you have received for academic research of this work. If there are none state 'there are none'.

**Please state any sources of funding for your research**

Research in the present study was supported in part by a COBRE grant (P20 GM103453-10) from the National Institute of General Medical Sciences at the National Institutes of Health, by PHS grant NIH R21DA027466, and by the University of Louisville CREAM Center from NSF EPSCoR grant EPS-0447479.

**Signature** (a scanned signature is acceptable, but each author must sign)

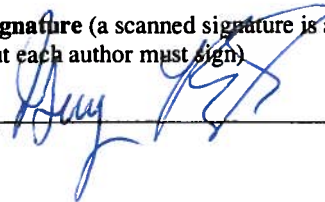  
\_\_\_\_\_

**Print name**

  
\_\_\_\_\_

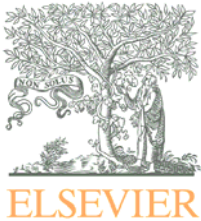

**Toxicology**  
**Conflict of Interest Policy**

Manuscript number (if applicable):  
Article Title: DEVELOPMENTAL CIGARETTE SMOKE  
EXPOSURE: HIPPOCAMPUS PROTEOME AND  
METABOLOME PROFILES IN LOW BIRTH WEIGHT  
PIIPS

Author name: Rachel E. Neal, Jing Chen, Rekha  
Jagadapillai, HyeJeong Jang, Guy Brock, Bassam  
Abomoelak, Robert M. Greene, M. Michele Pisano

**Declarations**

*Toxicology* requires that all authors sign a declaration of conflicting interests. If you have nothing to declare in any of these categories then this should be stated.

**Conflict of Interest**

Please declare any financial or personal interests that might be potentially viewed to influence the work presented. Interests could include consultancies, honoraria, patent ownership or other. If there are none state 'there are none'.

**Please state any competing interests**

None

**Funding Source**

All sources of funding should be acknowledged and you should declare any extra funding you have received for academic research of this work. If there are none state 'there are none'.

**Please state any sources of funding for your research**

Research in the present study was supported in part by a COBRE grant (P20 GM103453-10) from the National Institute of General Medical Sciences at the National Institutes of Health, by PHS grant NIH R21DA027466, and by the University of Louisville CREAM Center from NSF EPSCoR grant EPS-0447479.

**Signature** (a scanned signature is acceptable, but each author must sign)

**Print name**

Robert M. Greene

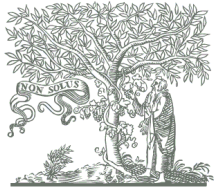

ELSEVIER

**Toxicology**  
**Conflict of Interest Policy**

Manuscript number (if applicable):

Article Title: DEVELOPMENTAL CIGARETTE SMOKE  
EXPOSURE: HIPPOCAMPUS PROTEOME AND  
METABOLOME PROFILES IN LOW BIRTH WEIGHT  
PIIDS

Author name: Rachel E. Neal, Jing Chen, Rekha  
Jagadapillai, HyeJeong Jang, Guy Brock, Bassam  
Abomoelak, Robert M. Greene, M. Michele Pisano

**Declarations**

**Toxicology** requires that all authors sign a declaration of conflicting interests. If you have nothing to declare in any of these categories then this should be stated.

**Conflict of Interest**

Please declare any financial or personal interests that might be potentially viewed to influence the work presented. Interests could include consultancies, honoraria, patent ownership or other. If there are none state 'there are none'.

**Please state any competing interests**

None

**Funding Source**

All sources of funding should be acknowledged and you should declare any extra funding you have received for academic research of this work. If there are none state 'there are none'.

**Please state any sources of funding for your research**

Research in the present study was supported in part by a COBRE grant (P20 GM103453-10) from the National Institute of General Medical Sciences at the National Institutes of Health, by PHS grant NIH R21DA027466, and by the University of Louisville CREAM Center from NSF EPSCoR grant EPS-0447479.

**Signature** (a scanned signature is acceptable, but each author must sign)

**Print name**

M. Michele Pisano 8/22/13
